# Supplementary material
Source: PubMed Central journal article supplement (PMC7584872)
Supplement: pnas.2004657117.sapp.pdf [file pnas.2004657117.sapp.pdf]

# PNAS

[www.pnas.org](http://www.pnas.org)

Supplementary Information for

**Crystal structure of tomato spotted wilt virus G<sub>N</sub> reveals a unique dimerization and an evolutionary link to animal infecting viruses**

Yoav Bahat<sup>a</sup>, Joel Alter<sup>a</sup> and Moshe Dessau<sup>a,1</sup>

<sup>a</sup>Azieli Faculty of Medicine, Bar-Ilan University, Safed, Israel

<sup>1</sup>To whom correspondence should be addressed: E-mail: [moshe.dessau@biu.ac.il](mailto:moshe.dessau@biu.ac.il). 8 Henrietta Szold St. , B 104, Safed 1311502, Israel. Phone: +972 (72) 264-4905, Fax: +972 (4) 6229256.

Corresponding author: Moshe Dessau

Email: [moshe.dessau@biu.ac.il](mailto:moshe.dessau@biu.ac.il)

**This PDF file includes:**

Figures S1 to S5  
Tables S1  
SI References

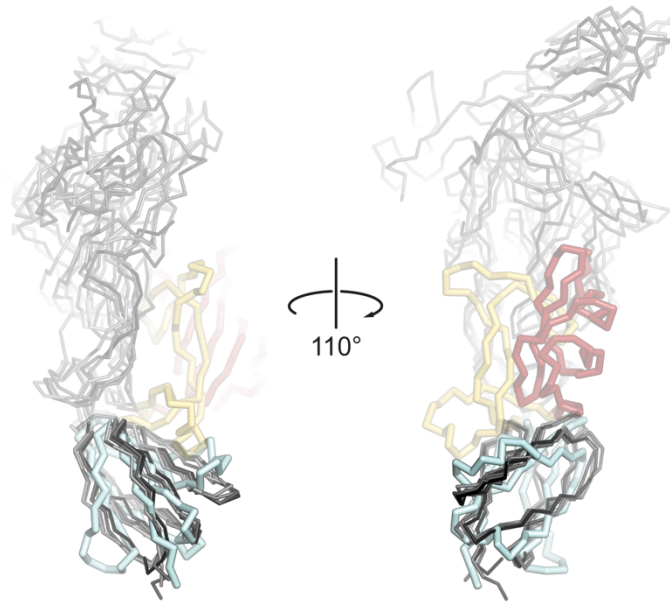

**Fig. S1. Superposition of TSWV with alphavirus E2.** TSWV G<sub>N</sub> structure was superimposed onto various structures of alphavirus E2; CHIKV (5ANY), Sinbis virus (3MUU), Eastern Equine Encephalitis Virus (6MX4) and Venezuelan Equine Encephalitis Virus (3J0C). The average RMAD was 2.9 Å over ~70 residues of the CTD.

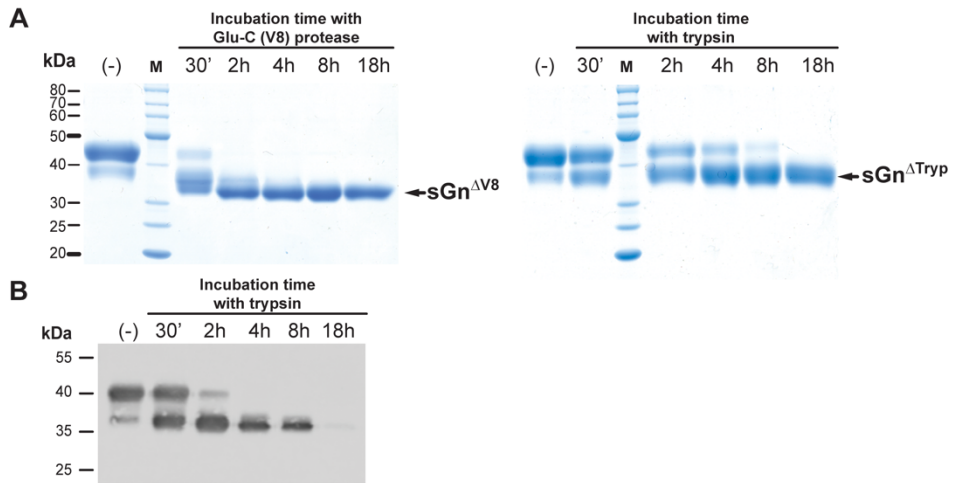

**Fig. S2. Limited proteolysis of sG<sub>N</sub>.** Purified sG<sub>N</sub> was incubated on ice with either Glu-C (V8) protease or Trypsin at a protein to protease ratio of 150:1 or 1000:1, respectively. Aliquots were taken from the reaction at the indicated times, SDS sample buffer was added, and samples were boiled and analyzed later by SDS-PAGE and Coomassie blue staining. The digestion products are noted on right side of the relevant gel.

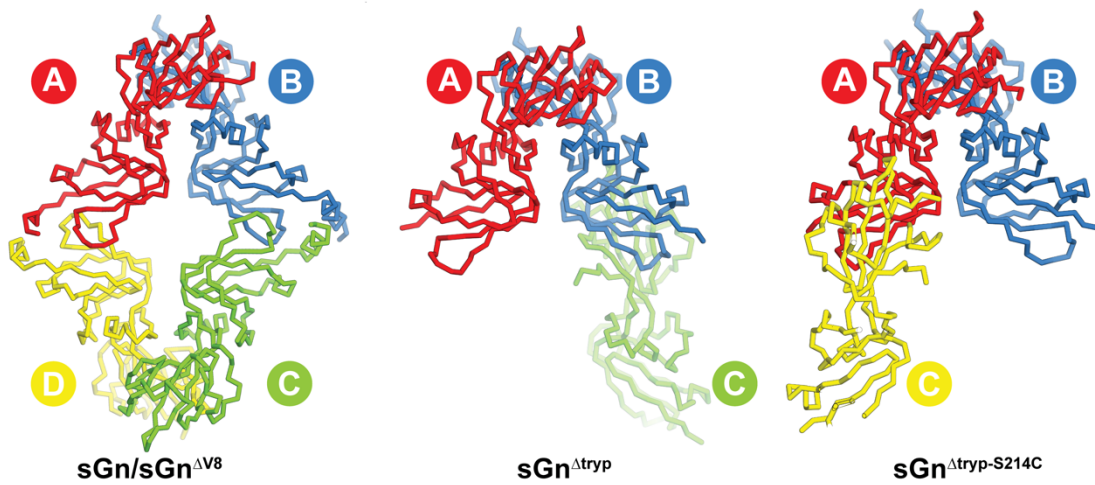

**Fig. S3. Asymmetric unit (ASU) organization in the different crystal forms.** Ribbon representation of the packing of the different  $G_N$  constructs. Each chain is noted by a different color with the same labeling as in Figure 4.

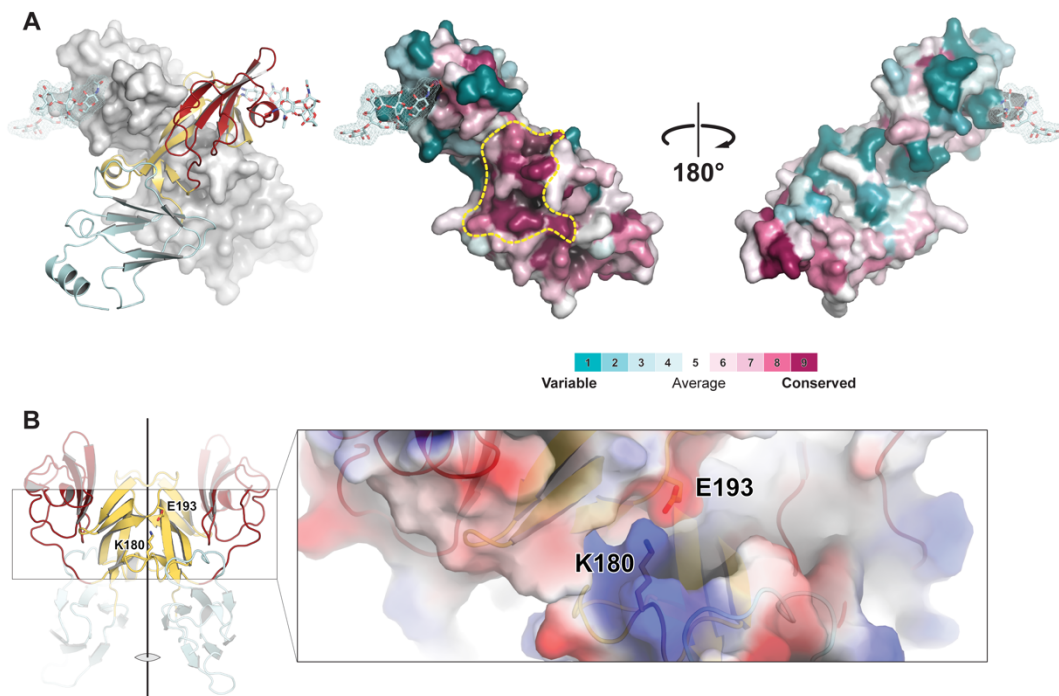

**Fig. S4. Conservation analysis and electrostatic surface potential complementarity in the PD-PD dimer interface.** (A) CONSURF analysis (1, 2). On the left, a view of  $G_N$  non-covalent dimer for orientation. Conservation scores are as per legend. See materials and methods for GeneBank numbers of the aligned sequences. The interface that participates in the dimerization is highlighted by the dashed yellow line. (B) Cartoon representation of the non-covalent dimer (left) in a view perpendicular to the two-fold axis. Residues that participate in the electrostatic interaction are shown as sticks. On the right is a surface representation of the electrostatic molecular surface potential at the dimer interface, calculated using the APBS plugin in PyMOL (The PyMOL Molecular Graphics System, Version 1.8, Schrödinger, LLC.)

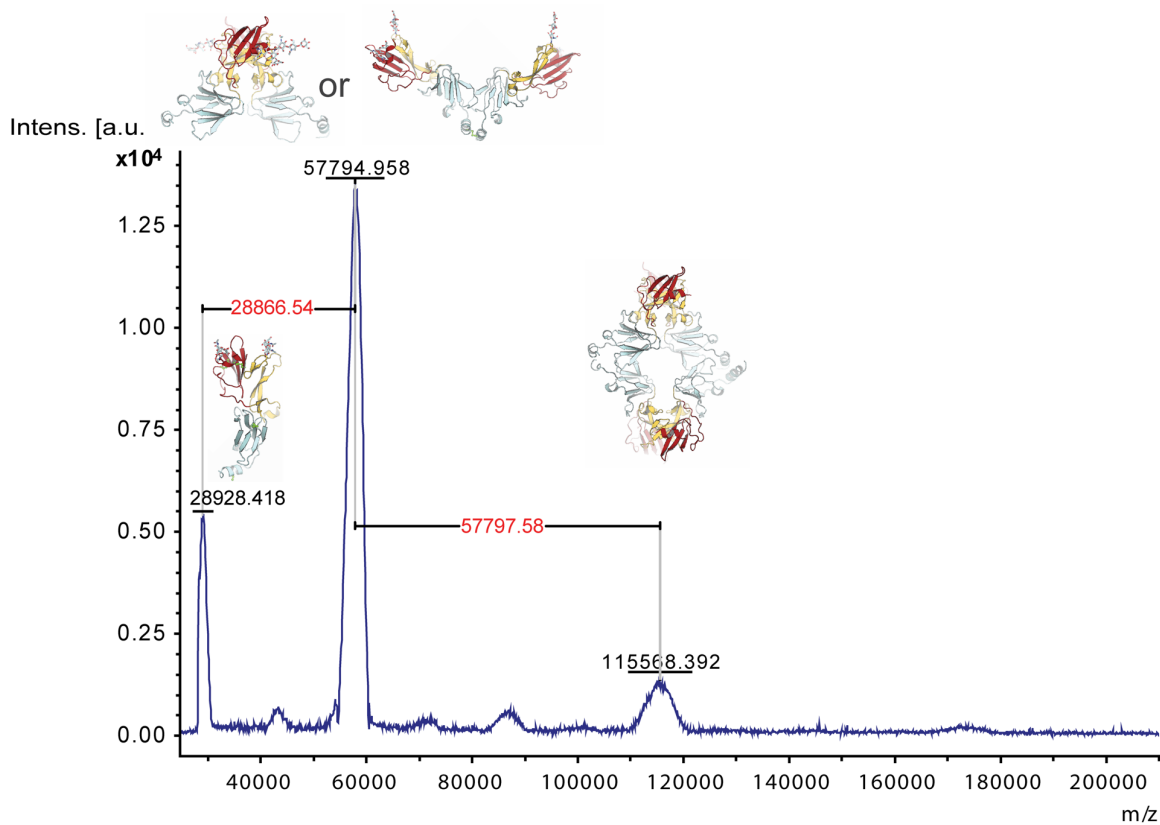

**Fig. S5. MALDI-TOF analysis of  $sGN^{\Delta V8}$  dissolved crystals.** The peaks in the figure correspond to the indicated masses in black. Red masses correspond to the mass differences between the peaks. Peaks were assigned to either monomers, dimers or tetramers.

**Table S1. Data collection and refinement statistics**

|                                                     | <b>sGN-Os</b>                            | <b>sGN</b>                        | <b>sGN<sup>ΔV8</sup></b>          | <b>sGN<sup>ΔTryp</sup></b>        | <b>sGN<sup>ΔTryp-S214C</sup></b>   |                                    |
|-----------------------------------------------------|------------------------------------------|-----------------------------------|-----------------------------------|-----------------------------------|------------------------------------|------------------------------------|
| PDB ID                                              |                                          | 6Y9L                              | 6Y9M                              | 6YA0                              | 6YA2                               |                                    |
| <b>Data collection</b>                              |                                          |                                   |                                   |                                   |                                    |                                    |
| Wavelength                                          | 1.14                                     | 0.9763                            | 1.03961                           | 0.9795                            | 0.9184                             |                                    |
| Resolution range <sup>a</sup>                       | 72.64-4.5<br>(4.66-4.5)                  | 49.02-4.10<br>(4.25-4.10)         | 45.6-3.4<br>(3.52 - 3.4)          | 46.2- 2.86<br>(2.96- 2.86)        | 18.83-2.50<br>(2.59- 2.50)         |                                    |
| Space group                                         | C222 <sub>1</sub>                        | C222 <sub>1</sub>                 | C222 <sub>1</sub>                 | P2 <sub>1</sub>                   | P2 <sub>1</sub>                    |                                    |
| Unit cell                                           | <i>a, b, c</i> (Å)<br><i>α, β, γ</i> (°) | 167.8, 217.2, 145.2<br>90, 90, 90 | 166.0, 215.9, 146.4<br>90, 90, 90 | 167.2, 218.2, 145.5<br>90, 90, 90 | 68.8, 74.9, 81.3<br>90, 103.27, 90 | 69.7, 76.0, 71.2<br>90, 106.56, 90 |
| Total reflections                                   | 422805 (43456)                           | 133273 (11408)                    | 1399124 (86127)                   | 63863 (6628)                      | 170586 (17809)                     |                                    |
| Unique reflections                                  | 30437 (1596)                             | 20687 (1798)                      | 36907 (3602)                      | 18705 (215)                       | 24421 (704)                        |                                    |
| Multiplicity                                        | 13.9 (14.2)                              | 6.4 (6.2)                         | 37.9 (23.6)                       | 3.4 (3.6)                         | 7.0 (7.2)                          |                                    |
| Completeness (%)                                    | 99.95 (99.94)                            | 98.18 (86.55)                     | 99.74 (98.39)                     | 75.92 (11.55)                     | 82.56 (28.45)                      |                                    |
| Mean I/sigma(I)                                     | 11.48 (1.05)                             | 8.58 (0.36)                       | 18.13 (0.64)                      | 10.51 (0.95)                      | 13.21 (0.97)                       |                                    |
| Wilson B-factor                                     | 40                                       | 295.07                            | 160.71                            | 77.68                             | 50.18                              |                                    |
| R <sub>merge</sub> <sup>b</sup>                     | 0.1167 (2.61)                            | 0.1069 (4)                        | 0.1526 (6.68)                     | 0.06385 (1.53)                    | 0.1019 (1.80)                      |                                    |
| R <sub>meas</sub>                                   | 0.1212 (2.71)                            | 0.1166 (4.36)                     | 0.1547 (6.83)                     | 0.07598 (1.80)                    | 0.1101 (1.94)                      |                                    |
| R <sub>rim</sub>                                    | 0.03261 (0.72)                           | 0.0461 (1.71)                     | 0.02501 (1.39)                    | 0.0408 (0.95)                     | 0.04131 (0.72)                     |                                    |
| CC1/2                                               | 0.999 (0.56)                             | 0.998 (0.23)                      | 1 (0.28)                          | 0.998 (0.49)                      | 0.998 (0.58)                       |                                    |
| CC*                                                 | 1 (0.85)                                 | 1 (0.61)                          | 1 (0.66)                          | 1 (0.81)                          | 1 (0.86)                           |                                    |
| <b>Refinement statistics</b>                        |                                          |                                   |                                   |                                   |                                    |                                    |
| Reflections used in refinement                      |                                          | 20554 (1795)                      | 36843 (3601)                      | 14242 (215)                       | 20416 (684)                        |                                    |
| Reflections used for R <sub>free</sub> <sup>c</sup> |                                          | 1028 (91)                         | 1840 (171)                        | 1425 (21)                         | 1026 (36)                          |                                    |
| R <sub>work</sub> <sup>c</sup>                      |                                          | 0.2765 (0.4339)                   | 0.2645 (0.42)                     | 0.2175 (0.3126)                   | 0.2130 (0.2987)                    |                                    |
| R <sub>free</sub> <sup>c</sup>                      |                                          | 0.3017 (0.4681)                   | 0.2884 (0.4431)                   | 0.2613 (0.4644)                   | 0.2445 (0.3392)                    |                                    |
| Number of non-hydrogen atoms                        |                                          | 6325                              | 6441                              | 4396                              | 4438                               |                                    |
| macromolecules                                      |                                          | 6082                              | 6148                              | 4264                              | 4247                               |                                    |
| ligands                                             |                                          | 243                               | 286                               | 100                               | 112                                |                                    |
| solvent                                             |                                          | -                                 | 7                                 | 32                                | 79                                 |                                    |
| Protein residues                                    |                                          | 801                               | 791                               | 560                               | 551                                |                                    |
| RMS <sup>d</sup> (bonds)                            |                                          | 0.004                             | 0.011                             | 0.006                             | 0.006                              |                                    |
| RMS <sup>d</sup> (angles)                           |                                          | 0.72                              | 1.42                              | 0.76                              | 1.02                               |                                    |
| <b>Ramachandran</b> favored (%)                     |                                          | 88.9                              | 93.5                              | 93.39                             | 97.05                              |                                    |
| allowed (%)                                         |                                          | 10.71                             | 6.5                               | 6.42                              | 2.95                               |                                    |
| outliers (%)                                        |                                          | 0.39                              | 0                                 | 0.18                              | 0                                  |                                    |
| Rotamer outliers (%)                                |                                          | 3.76                              | 0.69                              | 5.94                              | 4.17                               |                                    |
| <b>B-factor</b>                                     |                                          |                                   |                                   |                                   |                                    |                                    |
| Average                                             |                                          | 331.02                            | 159.34                            | 91.45                             | 75.27                              |                                    |
| macromolecules                                      |                                          | 326.95                            | 155.75                            | 92.21                             | 73.81                              |                                    |
| <b>Synchrotron Beam line</b>                        | ESRF ID29                                | BESSY II 14.1                     | ESRF ID23-1                       | ESRF ID29                         | BESSY II 14.2                      |                                    |

<sup>a</sup> Highest resolution shell is shown in parentheses

<sup>b</sup>  $R_{\text{merge}} = \sum_{hkl} \sum_i |I_{hkl,i} - \langle I \rangle_{hkl}| / \sum_{hkl} \sum_i I_{hkl,i}$ , where  $I_{hkl}$  is the intensity of a reflection and  $\langle I \rangle_{hkl}$  is the average of all observations of the reflection

<sup>c</sup>  $R_{\text{free}}$ ,  $R_{\text{work}}$  with 10% of  $F_{\text{obs}}$  sequestered before refinement

<sup>d</sup> R.M.S., root mean square

## SI References

1. M. Landau *et al.*, ConSurf 2005: the projection of evolutionary conservation scores of residues on protein structures. *Nucleic Acids Res* **33**, W299-302 (2005).
2. H. Ashkenazy, E. Erez, E. Martz, T. Pupko, N. Ben-Tal, ConSurf 2010: calculating evolutionary conservation in sequence and structure of proteins and nucleic acids. *Nucleic Acids Res* **38**, W529-533 (2010).
